# Supplementary material for: Variations in γ′ formers and refractory elements for enhanced creep resistance and phase stability of an advanced Ni-based superalloy
Source: Royal Society of Chemistry journal article supplement (doi:10.1039/d4ma00334a), 2024-01-01
Supplement: d4ma00334a1.pdf [file d4ma00334a1.pdf]

## Supplementary Materials

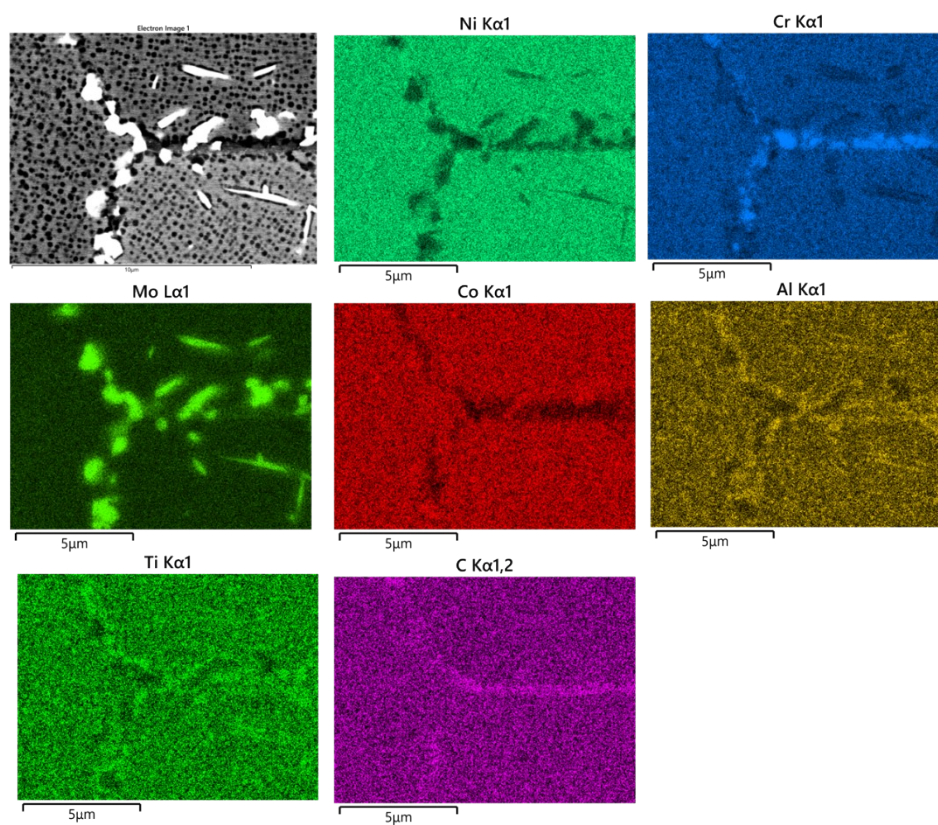

**Figure S1.** EDS chemical maps of STD alloy at the triple junctions of grain boundaries following exposure at 800 °C for 5000 h, showing the precipitated Mo-rich  $\mu$  phase.

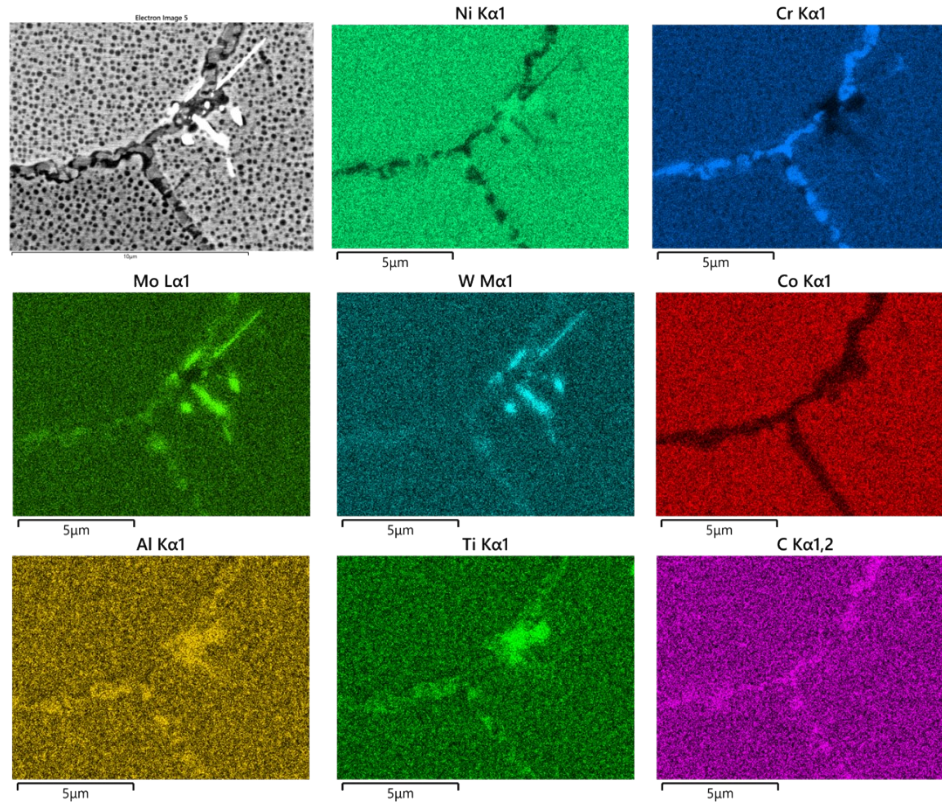

**Figure S2.** EDS chemical maps of Q alloy at the triple junctions of grain boundaries following exposure at 800 °C for 5000 h, showing the precipitated Mo and W-rich  $\mu$  phase.
